# Supplementary material for: Fluorescent Alloyed CdZnSeS/ZnS Nanosensor for Doxorubicin Detection
Source: MDPI journal article supplement (doi:10.3390/bios13060596), 2023-05-31
Supplement: s1 [file s1]

*Supplementary Material*

# Fluorescent Alloyed CdZnSeS/ZnS Nanosensor for Doxorubicin Detection

Svetlana A. Mescheryakova, Ivan S. Matlakhov, Pavel D. Strokin, Daniil D. Drozd, Irina Yu. Goryacheva and Olga A. Goryacheva \*

Saratov State University named after N.G. Chernyshevsky, Department of General and Inorganic Chemistry, Chemistry Institute, Astrakhanskaya 83, 410012 Saratov, Russia; meshcheryakova.s.a@gmail.com (S.A.M.); ivmatl.anohse@yandex.ru (I.S.M.); stropa99@mail.ru (P.D.S.); dan64rus@gmail.com (D.D.D.); goryachevaiy@mail.ru (I.Y.G.)

\* Correspondence: olga.goryacheva.93@mail.ru

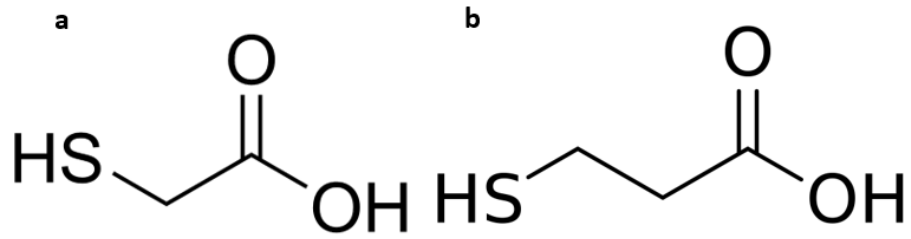

**Figure S1.** Formulas of (a) Thioglycolic acid and (b) 3-mercaptopropionic acid.

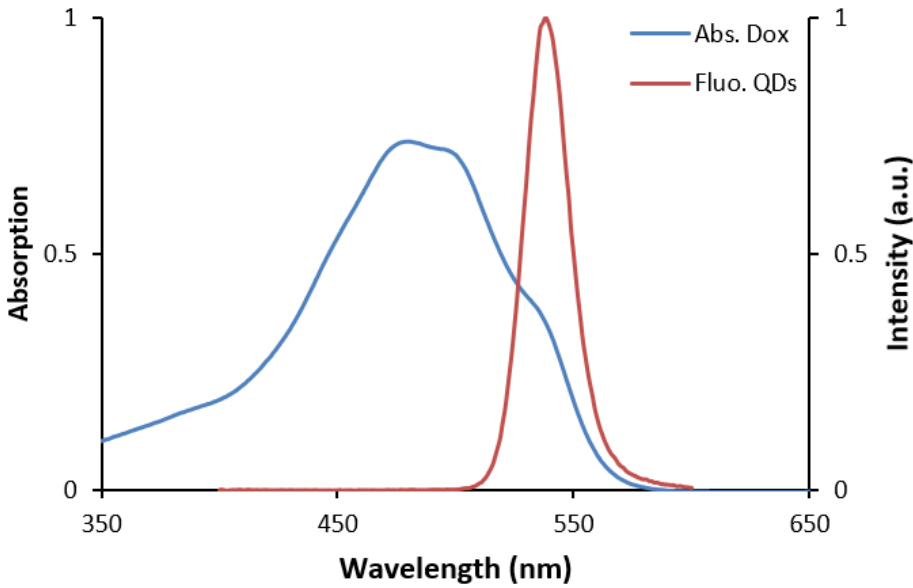

**Figure S2.** An overlap between the QDs fluorescence spectrum (red) and DOX absorption spectrum (blue).

**Table S1.** Correspondence of DOX concentration in  $\mu\text{g/mL}$  and  $\mu\text{M}$  (DOX Molecular Weight 543.5).

|                  |   |      |      |      |     |     |     |      |      |    |     |     |     |
|------------------|---|------|------|------|-----|-----|-----|------|------|----|-----|-----|-----|
| $\mu\text{g/mL}$ | 0 | 0.25 | 0.05 | 0.75 | 1   | 2.5 | 5   | 10   | 25   | 50 | 100 | 250 | 500 |
| $\mu\text{M}$    | 0 | 0.46 | 0.92 | 1.38 | 1,8 | 4.6 | 9.2 | 18.4 | 45.6 | 92 | 184 | 460 | 920 |

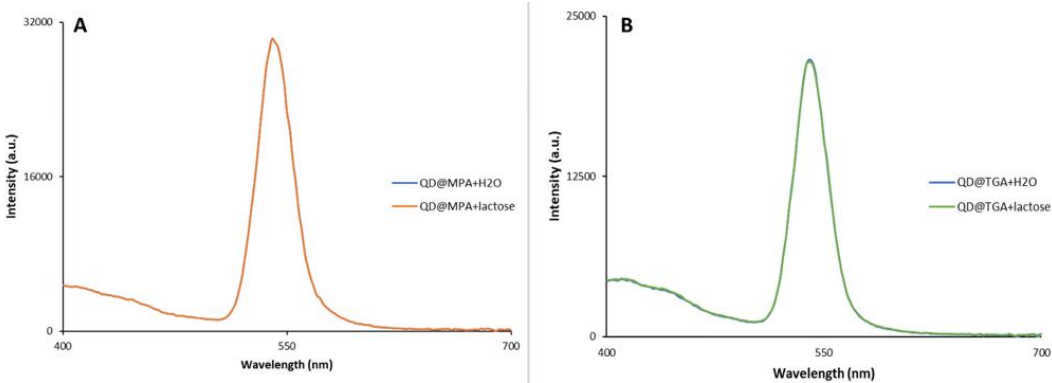

**Figure S3.** Fluorescence spectra of QDs stabilized with 3-mercaptopropionic acid (A) and thioglycolic acid (B) with and without lactose.

Two approaches were used for LOD calculations:

**Formula S1**

$$\text{LOD} = I_0 - 3\sigma$$

$I_0$  – QDs fluorescence intensity in the absence of DOX, middle for 11 measurements

$\sigma$  - standard deviation of QDs fluorescence intensity in the absence of DOX

Because of in our case we have signal decreasing we have used minus in the formula

**Formula S2**

$$\text{LOD} = 3.3\sigma/S,$$

$\sigma$  is the standard deviation of response

S is the slope of calibration curve  $\Delta I$  vs  $C_{\text{DOX}}$ .

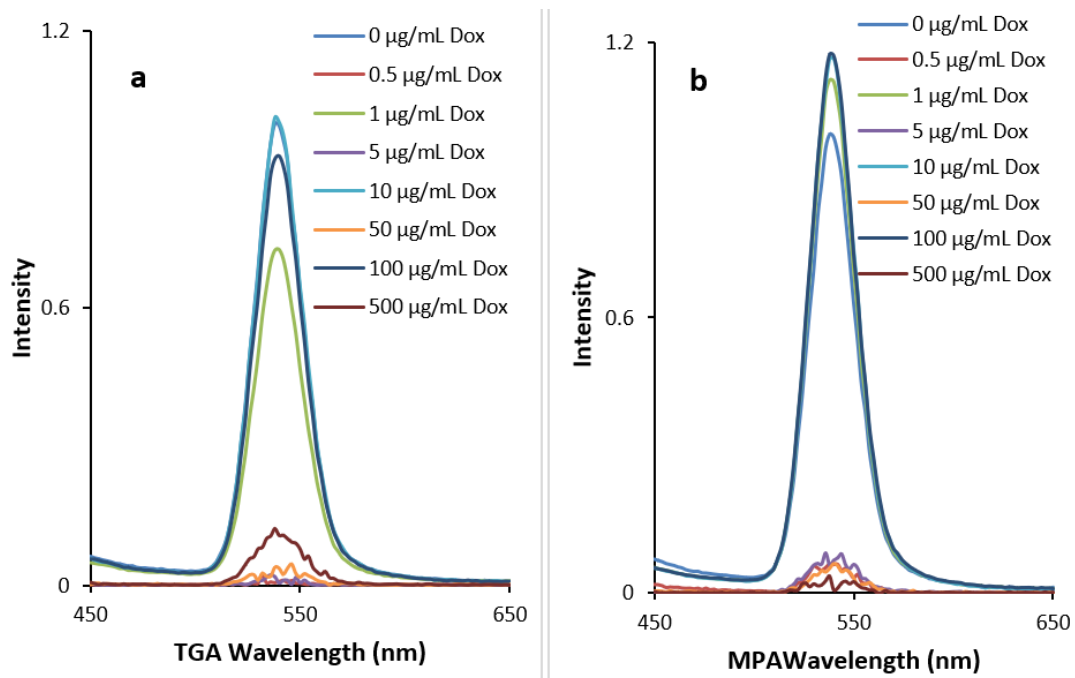

**Figure S4.** Fluorescence spectra of QDs stabilized with 3-mercaptopropionic acid (a) and thioglycolic acid (b) in X10 diluted plasma, spiked with DOX.
